# Supplementary material for: Inflorescence photosynthetic contribution to fitness releases Arabidopsis thaliana plants from trade-off constraints on early flowering
Source: PLoS One. 2017 Oct 3;12(10):e0185835. doi: 10.1371/journal.pone.0185835 (PMC5626516; doi:10.1371/journal.pone.0185835)
Supplement: S2 File — (XLSX) [file pone.0185835.s002.xlsx]

## Sheet: Sheet1
		N	Minimum	Maximum	Mean		Std. Deviation
		Statistic	Statistic	Statistic	Statistic	Std. Error	Statistic	Treatement	ecotype
	branches	5	4	6	5.4	0.4	0.894427	Control	1
	branches	5	3	8	5.8	0.8	1.78885	Test	1
	branches	5	5	6	5.2	0.2	0.447214	Control	3
	branches	5	2	5	3.8	0.583095	1.30384	Test	3
	branches	5	0	4	2.8	0.734847	1.64317	Control	4
	branches	5	4	5	4.8	0.2	0.447214	Test	4
	branches	5	3	5	3.6	0.4	0.894427	Control	6
	branches	5	4	7	4.8	0.583095	1.30384	Test	6
	branches	5	5	8	6.2	0.583095	1.30384	Control	8
	branches	5	3	7	5	0.632456	1.41421	Test	8
	branches	5	4	6	4.8	0.374166	0.83666	Control	9
	branches	5	2	4	3.2	0.374166	0.83666	Test	9
	branches	5	5	6	5.2	0.2	0.447214	Control	10
	branches	5	4	6	5.6	0.4	0.894427	Test	10
	branches	5	4	7	5.6	0.509902	1.14018	Control	11
	branches	4	2	4	3.5	0.5	1	Test	11
	branches	5	5	7	6	0.447214	1	Control	12
	branches	5	6	9	6.8	0.583095	1.30384	Test	12
	branches	2	4	5	4.5	0.5	0.707107	Control	13
	branches	3	5	5	5	0	0	Test	13
	branches	4	4	7	5.75	0.629153	1.25831	Control	14
	branches	5	3	6	4.6	0.509902	1.14018	Test	14
	branches	5	0	8	5	1.34164	3	Control	15
	branches	5	0	7	3.8	1.11355	2.48998	Test	15
	branches	5	2	6	5	0.774597	1.73205	Control	16
	branches	5	3	7	5.6	0.678233	1.51658	Test	16
	branches	5	3	7	5.2	0.663325	1.48324	Control	17
	branches	5	4	4	4	0	0	Test	17
	branches	5	5	6	5.2	0.2	0.447214	Control	18
	branches	5	2	5	4	0.547723	1.22474	Test	18
	branches	5	5	7	6.4	0.4	0.894427	Control	19
	branches	5	5	8	6.4	0.509902	1.14018	Test	19
	flowering	5	35	37	36	0.316228	0.707107	Control	1
	flowering	5	34	37	35.2	0.583095	1.30384	Test	1
	flowering	5	30	33	32.2	0.583095	1.30384	Control	3
	flowering	5	33	34	33.4	0.244949	0.547723	Test	3
	flowering	5	31	33	32	0.447214	1	Control	4
	flowering	5	31	36	33.2	0.860233	1.92354	Test	4
	flowering	5	26	30	28	0.632456	1.41421	Control	6
	flowering	5	28	31	29.2	0.583095	1.30384	Test	6
	flowering	5	30	35	32.6	0.87178	1.94936	Control	8
	flowering	5	30	36	32.4	1.1225	2.50998	Test	8
	flowering	5	26	29	27.8	0.489898	1.09545	Control	9
	flowering	5	26	30	28.2	0.663325	1.48324	Test	9
	flowering	5	30	34	32	0.83666	1.87083	Control	10
	flowering	5	33	34	33.6	0.244949	0.547723	Test	10
	flowering	5	29	33	30.8	0.734847	1.64317	Control	11
	flowering	4	30	33	31	0.707107	1.41421	Test	11
	flowering	5	32	34	32.8	0.374166	0.83666	Control	12
	flowering	5	31	33	32.2	0.374166	0.83666	Test	12
	flowering	5	30	36	33.6	0.979796	2.19089	Control	13
	flowering	5	31	33	32.4	0.4	0.894427	Test	13
	flowering	5	32	33	32.4	0.244949	0.547723	Control	14
	flowering	5	31	40	33.8	1.62481	3.63318	Test	14
	flowering	4	35	40	37.5	1.44338	2.88675	Control	15
	flowering	5	30	46	38	3.34664	7.48331	Test	15
	flowering	5	34	36	35.2	0.374166	0.83666	Control	16
	flowering	5	35	40	36.4	0.927362	2.07364	Test	16
	flowering	5	29	32	30.2	0.489898	1.09545	Control	17
	flowering	5	29	30	29.8	0.2	0.447214	Test	17
	flowering	5	30	37	33.4	1.1225	2.50998	Control	18
	flowering	5	30	43	35.2	2.55734	5.71839	Test	18
	flowering	5	30	39	34	1.51658	3.39116	Control	19
	flowering	5	31	33	32.4	0.4	0.894427	Test	19
	fruits	5	74	185	137.4	18.1235	40.5253	Control	1
	fruits	5	68	129	94.8	9.83565	21.9932	Test	1
	fruits	5	157	288	211.4	23.1594	51.7861	Control	3
	fruits	5	59	143	105	16.1462	36.104	Test	3
	fruits	5	29	144	93.8	19.03	42.5523	Control	4
	fruits	5	55	175	113.8	22.6305	50.6034	Test	4
	fruits	5	64	226	130	26.342	58.9025	Control	6
	fruits	5	100	177	123.6	14.1796	31.7065	Test	6
	fruits	5	149	265	190.6	20.1336	45.02	Control	8
	fruits	5	58	182	110.8	21.9531	49.0887	Test	8
	fruits	5	145	227	174.4	14.7973	33.0878	Control	9
	fruits	5	93	119	106	4.19524	9.38083	Test	9
	fruits	5	173	265	202.2	16.1969	36.2174	Control	10
	fruits	5	108	180	136.2	12.2817	27.4627	Test	10
	fruits	5	114	178	138	10.775	24.0936	Control	11
	fruits	4	59	114	89.25	11.3385	22.6771	Test	11
	fruits	5	123	184	140.8	11.0968	24.8133	Control	12
	fruits	5	88	131	102.6	8.18902	18.3112	Test	12
	fruits	4	0	154	67.5	39.7356	79.4712	Control	13
	fruits	5	0	213	102.2	43.4941	97.2558	Test	13
	fruits	4	93	208	164.25	25.5257	51.0514	Control	14
	fruits	5	42	98	71.4	9.7242	21.744	Test	14
	fruits	5	25	167	125.6	25.7402	57.5569	Control	15
	fruits	5	11	80	56.4	12.209	27.3002	Test	15
	fruits	5	74	134	116.6	11.03	24.6637	Control	16
	fruits	5	60	83	69.8	4.48776	10.0349	Test	16
	fruits	5	155	331	222.6	33.5225	74.9587	Control	17
	fruits	5	43	132	101	15.5467	34.7635	Test	17
	fruits	5	186	263	211.4	13.909	31.1014	Control	18
	fruits	5	59	106	89.2	9.04102	20.2163	Test	18
	fruits	5	122	182	162.8	10.97	24.5296	Control	19
	fruits	5	81	143	111.8	11.342	25.3614	Test	19
	Growth	5	0.7	1	0.847898	0.0487133	0.108926	Control	1
	Growth	5	0.689655	1.19355	0.878714	0.0873205	0.195255	Test	1
	Growth	5	0.555556	0.863636	0.630334	0.058901	0.131707	Control	3
	Growth	5	0.407407	0.615385	0.527701	0.0341509	0.0763638	Test	3
	Growth	5	0.444444	0.791667	0.609343	0.0659444	0.147456	Control	4
	Growth	5	0.392857	0.666667	0.55172	0.0623935	0.139516	Test	4
	Growth	5	0.454545	0.636364	0.553788	0.0302177	0.0675688	Control	6
	Growth	5	0.458333	0.681818	0.581061	0.0384353	0.085944	Test	6
	Growth	5	0.636364	0.769231	0.688717	0.0244769	0.054732	Control	8
	Growth	5	0.538462	0.730769	0.605646	0.0356901	0.0798056	Test	8
	Growth	5	0.375	0.545455	0.442424	0.0344135	0.0769508	Control	9
	Growth	5	0.454545	0.545455	0.474242	0.0178232	0.0398538	Test	9
	Growth	5	0.68	1.08333	0.789846	0.0748046	0.167268	Control	10
	Growth	5	0.625	0.84	0.718	0.0369361	0.0825917	Test	10
	Growth	5	0.481481	0.583333	0.537963	0.0162631	0.0363654	Control	11
	Growth	4	0.346154	0.541667	0.461538	0.0420552	0.0841104	Test	11
	Growth	5	0.576923	0.708333	0.633462	0.0238237	0.0532715	Control	12
	Growth	5	0.625	0.727273	0.690152	0.0178232	0.0398538	Test	12
	Growth	5	0.555556	0.75	0.673232	0.0337251	0.0754117	Control	13
	Growth	5	0.52	0.863636	0.666394	0.0579653	0.129614	Test	13
	Growth	5	0.592593	0.777778	0.700228	0.0310904	0.0695202	Control	14
	Growth	5	0.314286	0.769231	0.622473	0.0796325	0.178064	Test	14
	Growth	4	0.625	1.32258	1.08325	0.16094	0.32188	Control	15
	Growth	4	0.703704	1.38462	0.902574	0.16237	0.32474	Test	15
	Growth	5	0.75	1.07407	0.921408	0.0593594	0.132732	Control	16
	Growth	5	0.821429	1.03571	0.956897	0.0427448	0.0955803	Test	16
	Growth	5	0.545455	0.681818	0.598485	0.0224733	0.0502519	Control	17
	Growth	5	0.590909	0.636364	0.618182	0.011134	0.0248965	Test	17
	Growth	5	0.769231	0.851852	0.801068	0.0148533	0.033213	Control	18
	Growth	5	0.75	1.14286	0.914865	0.0697426	0.155949	Test	18
	Growth	5	0.461538	0.821429	0.685381	0.0597591	0.133625	Control	19
	Growth	5	0.666667	0.818182	0.713636	0.0307169	0.068685	Test	19
	Growth_19	5	0.6	0.666667	0.633333	0.0139443	0.0311805	Control	1
	Growth_19	5	0.55	0.7	0.64	0.0244949	0.0547723	Test	1
	Growth_19	5	0.5	0.666667	0.544444	0.0323942	0.0724356	Control	3
	Growth_19	5	0.4	0.611111	0.523333	0.0355034	0.0793881	Test	3
	Growth_19	5	0.45	0.611111	0.556667	0.0294182	0.0657812	Control	4
	Growth_19	5	0.388889	0.611111	0.523333	0.0446661	0.0998765	Test	4
	Growth_19	5	0.444444	0.666667	0.597778	0.040734	0.091084	Control	6
	Growth_19	5	0.5	0.611111	0.554444	0.02487	0.0556111	Test	6
	Growth_19	5	0.5	0.666667	0.608889	0.0305101	0.0682226	Control	8
	Growth_19	5	0.5	0.666667	0.597778	0.0270801	0.060553	Test	8
	Growth_19	5	0.444444	0.5	0.457778	0.0106284	0.0237658	Control	9
	Growth_19	5	0.444444	0.555556	0.532222	0.0219708	0.0491282	Test	9
	Growth_19	5	0.555556	0.75	0.683333	0.0346944	0.0775791	Control	10
	Growth_19	5	0.666667	0.722222	0.7	0.0136083	0.030429	Test	10
	Growth_19	5	0.45	0.6	0.53	0.0254951	0.0570088	Control	11
	Growth_19	4	0.3	0.611111	0.502778	0.0720618	0.144124	Test	11
	Growth_19	5	0.55	0.722222	0.64	0.0287282	0.0642382	Control	12
	Growth_19	5	0.7	0.777778	0.745556	0.0153559	0.0343367	Test	12
	Growth_19	5	0.5	0.722222	0.6	0.0368514	0.0824022	Control	13
	Growth_19	5	0.5	0.777778	0.688889	0.0515201	0.115202	Test	13
	Growth_19	5	0.55	0.722222	0.657778	0.0297417	0.0665044	Control	14
	Growth_19	5	0.35	0.722222	0.632222	0.0712845	0.159397	Test	14
	Growth_19	5	0.55	0.65	0.6	0.0223607	0.05	Control	15
	Growth_19	5	0.5	0.611111	0.552222	0.0236748	0.0529384	Test	15
	Growth_19	5	0.611111	0.777778	0.7	0.0283279	0.0633431	Control	16
	Growth_19	5	0.666667	0.777778	0.722222	0.0175682	0.0392837	Test	16
	Growth_19	5	0.555556	0.666667	0.622222	0.020787	0.0464811	Control	17
	Growth_19	5	0.611111	0.722222	0.644444	0.0222222	0.0496904	Test	17
	Growth_19	5	0.6	0.722222	0.674444	0.0220549	0.0493163	Control	18
	Growth_19	5	0.65	0.7	0.67	0.0122474	0.0273861	Test	18
	Growth_19	5	0.333333	0.666667	0.566667	0.061864	0.138332	Control	19
	Growth_19	5	0.555556	0.666667	0.622222	0.020787	0.0464811	Test	19
	Height	5	34	48	41.4	3.15595	7.05691	Control	1
	Height	5	31	43	38.6	2.11187	4.72229	Test	1
	Height	5	41	46	44	1.04881	2.34521	Control	3
	Height	5	34	40	37.2	1.15758	2.58844	Test	3
	Height	5	26	50	41	4.219	9.43398	Control	4
	Height	5	24	53	41.4	5.15364	11.5239	Test	4
	Height	5	28	40	34.2	1.90788	4.26615	Control	6
	Height	5	27	38	33.6	1.91311	4.27785	Test	6
	Height	5	41	50	46.2	1.49666	3.34664	Control	8
	Height	5	35	52	43	2.98329	6.67083	Test	8
	Height	5	26	30	28.4	0.748331	1.67332	Control	9
	Height	5	23	25	24	0.316228	0.707107	Test	9
	Height	5	41	49	45.8	1.39284	3.11448	Control	10
	Height	5	39	47	41.4	1.43527	3.20936	Test	10
	Height	5	39	48	44	1.51658	3.39116	Control	11
	Height	4	32	42	36.5	2.10159	4.20317	Test	11
	Height	5	40	49	45.2	1.52971	3.42053	Control	12
	Height	5	28	47	38.8	3.07246	6.87023	Test	12
	Height	2	46	51	48.5	2.5	3.53553	Control	13
	Height	3	36	49	42.6667	3.75648	6.50641	Test	13
	Height	4	25	45	38.5	4.71699	9.43398	Control	14
	Height	5	25	35	30.4	1.72047	3.84708	Test	14
	Height	5	23	51	42.8	5.04381	11.2783	Control	15
	Height	5	12	38	31.4	4.8949	10.9453	Test	15
	Height	5	43	53	48.2	1.82757	4.08656	Control	16
	Height	5	36	43	38.8	1.15758	2.58844	Test	16
	Height	5	28	52	42.4	4.00749	8.96103	Control	17
	Height	5	20	39	34	3.53553	7.90569	Test	17
	Height	5	53	64	57.8	1.88149	4.20714	Control	18
	Height	5	38	51	44	2.81069	6.2849	Test	18
	Height	5	26	42	36.6	2.76767	6.1887	Control	19
	Height	5	32	42	36.4	1.86011	4.15933	Test	19
	leaf_area	0						Control	1
	leaf_area	5	44.23	90.3	68.74	7.53387	16.8463	Test	1
	leaf_area	0						Control	3
	leaf_area	5	21.67	37.24	31.464	2.85673	6.38783	Test	3
	leaf_area	0						Control	4
	leaf_area	5	16.22	38.97	25.818	4.39277	9.82253	Test	4
	leaf_area	0						Control	6
	leaf_area	5	5.55	20.52	9.514	2.84473	6.36102	Test	6
	leaf_area	0						Control	8
	leaf_area	5	13.06	56.69	37.09	7.11867	15.9178	Test	8
	leaf_area	0						Control	9
	leaf_area	5	5.44	9.01	6.826	0.747908	1.67237	Test	9
	leaf_area	0						Control	10
	leaf_area	5	32.78	48.44	39.32	3.59954	8.04882	Test	10
	leaf_area	0						Control	11
	leaf_area	3	5.6	20.41	15.1867	4.79976	8.31342	Test	11
	leaf_area	0						Control	12
	leaf_area	5	41.36	51.28	45.864	1.65997	3.7118	Test	12
	leaf_area	0						Control	13
	leaf_area	5	21.05	35.44	27.284	2.58288	5.77549	Test	13
	leaf_area	0						Control	14
	leaf_area	5	14.5	44.72	27.284	4.93469	11.0343	Test	14
	leaf_area	0						Control	15
	leaf_area	5	25.14	115.62	54.162	15.788	35.303	Test	15
	leaf_area	0						Control	16
	leaf_area	5	50.29	76.44	63.596	5.38124	12.0328	Test	16
	leaf_area	0						Control	17
	leaf_area	5	13.2	18.25	15.29	1.07023	2.3931	Test	17
	leaf_area	0						Control	18
	leaf_area	5	17.05	78.58	47.3	11.6232	25.9902	Test	18
	leaf_area	0						Control	19
	leaf_area	5	21.28	37.59	29.096	2.68065	5.99411	Test	19
	nodes	5	5	7	6	0.316228	0.707107	Control	1
	nodes	5	3	6	4.8	0.583095	1.30384	Test	1
	nodes	5	2	4	2.6	0.4	0.894427	Control	3
	nodes	5	2	4	2.8	0.374166	0.83666	Test	3
	nodes	5	3	4	3.6	0.244949	0.547723	Control	4
	nodes	5	3	3	3	0	0	Test	4
	nodes	5	2	4	3	0.316228	0.707107	Control	6
	nodes	5	3	4	3.2	0.2	0.447214	Test	6
	nodes	5	3	6	3.6	0.6	1.34164	Control	8
	nodes	5	2	5	3.2	0.583095	1.30384	Test	8
	nodes	5	2	3	2.4	0.244949	0.547723	Control	9
	nodes	5	2	3	2.2	0.2	0.447214	Test	9
	nodes	5	4	4	4	0	0	Control	10
	nodes	5	4	5	4.2	0.2	0.447214	Test	10
	nodes	5	2	4	3	0.316228	0.707107	Control	11
	nodes	4	2	3	2.5	0.288675	0.57735	Test	11
	nodes	5	5	6	5.2	0.2	0.447214	Control	12
	nodes	5	5	7	5.6	0.4	0.894427	Test	12
	nodes	2	4	5	4.5	0.5	0.707107	Control	13
	nodes	3	5	6	5.33333	0.333333	0.57735	Test	13
	nodes	4	4	6	5.25	0.478714	0.957427	Control	14
	nodes	5	3	6	5.2	0.583095	1.30384	Test	14
	nodes	5	2	7	4.6	0.812404	1.81659	Control	15
	nodes	5	3	9	4.8	1.2	2.68328	Test	15
	nodes	5	6	7	6.4	0.244949	0.547723	Control	16
	nodes	5	5	8	6.6	0.509902	1.14018	Test	16
	nodes	5	3	4	3.2	0.2	0.447214	Control	17
	nodes	5	2	3	2.8	0.2	0.447214	Test	17
	nodes	5	5	7	5.6	0.4	0.894427	Control	18
	nodes	5	3	10	5.2	1.24097	2.77489	Test	18
	nodes	5	2	6	4.6	0.748331	1.67332	Control	19
	nodes	5	3	6	4.4	0.509902	1.14018	Test	19
	seed_p_pod	4	30.3	57	40.65	6.33042	12.6608	Control	1
	seed_p_pod	5	25	47.3	38.78	3.71098	8.29801	Test	1
	seed_p_pod	5	57.3	63.3	60.98	1.12401	2.51336	Control	3
	seed_p_pod	5	42	64.7	53.48	4.18454	9.35692	Test	3
	seed_p_pod	5	33	68.3	49.32	6.69055	14.9605	Control	4
	seed_p_pod	4	29	64.7	48.925	7.4041	14.8082	Test	4
	seed_p_pod	5	33.3	52.3	43.72	3.36725	7.52941	Control	6
	seed_p_pod	5	32	53.7	44.26	4.78086	10.6903	Test	6
	seed_p_pod	5	56	64.3	59.6	1.50964	3.37565	Control	8
	seed_p_pod	5	43	65	54.8	3.59708	8.04332	Test	8
	seed_p_pod	5	60.3	67.3	62.78	1.29283	2.89085	Control	9
	seed_p_pod	4	27.3	61	50.9	8.02361	16.0472	Test	9
	seed_p_pod	5	56.7	66.7	61.28	1.71155	3.82714	Control	10
	seed_p_pod	5	56	64.3	59.06	1.50087	3.35604	Test	10
	seed_p_pod	5	52.7	69.3	64.08	3.00606	6.72176	Control	11
	seed_p_pod	4	38	60.3	52.175	5.08058	10.1612	Test	11
	seed_p_pod	5	49.7	63	56.28	2.71651	6.07429	Control	12
	seed_p_pod	4	55.7	62	59.5	1.38384	2.76767	Test	12
	seed_p_pod	4	0	68.7	46.925	15.8452	31.6904	Control	13
	seed_p_pod	5	0	63	19.14	11.64	26.0278	Test	13
	seed_p_pod	4	40.7	62	52.5	4.44953	8.89906	Control	14
	seed_p_pod	5	15	53	37.88	6.28692	14.058	Test	14
	seed_p_pod	4	31.7	48.3	39.9	4.30426	8.60852	Control	15
	seed_p_pod	2	30.3	51.7	41	10.7	15.1321	Test	15
	seed_p_pod	5	44.3	53	47.2	1.51921	3.39706	Control	16
	seed_p_pod	5	30	57.3	42.74	4.63105	10.3553	Test	16
	seed_p_pod	5	21	68	44.74	9.03757	20.2086	Control	17
	seed_p_pod	4	46.3	51.3	49.9	1.20208	2.40416	Test	17
	seed_p_pod	5	45	58.7	51.8	2.65292	5.93212	Control	18
	seed_p_pod	5	35	54	43.48	3.59881	8.04717	Test	18
	seed_p_pod	5	39.3	66	52.6	5.0028	11.1866	Control	19
	seed_p_pod	5	50.3	69.3	61.38	3.25229	7.27234	Test	19
	seed_weight	4	29.2707	38.8925	34.4009	2.44095	4.8819	Control	1
	seed_weight	5	29.662	32.88	31.1653	0.52278	1.16897	Test	1
	seed_weight	5	20.2889	23.4789	22.0191	0.511444	1.14362	Control	3
	seed_weight	5	19.381	21.4429	20.4126	0.352032	0.787167	Test	3
	seed_weight	5	18.7265	26.5253	22.9777	1.5682	3.5066	Control	4
	seed_weight	4	18.8658	26.5	21.3462	1.73918	3.47835	Test	4
	seed_weight	5	16.51	23.5669	20.1031	1.23789	2.76802	Control	6
	seed_weight	5	15.91	22.0955	20.1904	1.11215	2.48685	Test	6
	seed_weight	5	18.886	22.7	20.851	0.680903	1.52255	Control	8
	seed_weight	5	12.7195	20.3692	17.9895	1.34642	3.0107	Test	8
	seed_weight	5	17.5347	22.0273	19.3053	0.839177	1.87646	Control	9
	seed_weight	4	16.4536	30.6341	20.6462	3.34554	6.69107	Test	9
	seed_weight	5	20.0508	23.8624	22.0444	0.752115	1.68178	Control	10
	seed_weight	4	20.1347	23.454	21.643	0.817001	1.634	Test	10
	seed_weight	5	19.25	29.8101	22.5231	1.86952	4.18037	Control	11
	seed_weight	4	15.9779	20.0088	18.3619	0.85301	1.70602	Test	11
	seed_weight	5	0	24.4631	18.1034	4.55292	10.1806	Control	12
	seed_weight	4	22.2796	23.918	23.1314	0.33564	0.671281	Test	12
	seed_weight	3	22.8564	25.2282	24.0282	0.684817	1.18614	Control	13
	seed_weight	3	14.873	30.8226	21.7319	4.73755	8.20567	Test	13
	seed_weight	4	18.7869	25.6923	21.4169	1.5047	3.0094	Control	14
	seed_weight	5	18.5975	28.4886	21.6745	1.75807	3.93116	Test	14
	seed_weight	4	25.9353	28.44	27.6856	0.588681	1.17736	Control	15
	seed_weight	2	23.8968	26.7912	25.344	1.44722	2.04667	Test	15
	seed_weight	5	23.0662	26.6541	24.3436	0.653549	1.46138	Control	16
	seed_weight	5	23.1064	26.8556	24.5152	0.679035	1.51837	Test	16
	seed_weight	4	17.575	28.9206	21.4107	2.58605	5.1721	Control	17
	seed_weight	4	16.0458	20.7974	18.4078	1.0379	2.07581	Test	17
	seed_weight	5	18.604	20.7955	19.3124	0.380932	0.851791	Control	18
	seed_weight	5	16.7982	20.0802	18.1725	0.540302	1.20815	Test	18
	seed_weight	5	17.2353	20.6414	18.8563	0.604614	1.35196	Control	19
	seed_weight	5	0	20.4944	15.6805	3.93468	8.7982	Test	19
	senescence	5	54	58	55.6	0.979796	2.19089	Control	1
	senescence	5	54	58	55.6	0.979796	2.19089	Test	1
	senescence	5	50	50	50	0	0	Control	3
	senescence	5	50	54	51.6	0.979796	2.19089	Test	3
	senescence	5	50	50	50	0	0	Control	4
	senescence	5	50	54	50.8	0.8	1.78885	Test	4
	senescence	5	50	50	50	0	0	Control	6
	senescence	4	50	50	50	0	0	Test	6
	senescence	5	50	54	50.8	0.8	1.78885	Control	8
	senescence	5	50	50	50	0	0	Test	8
	senescence	5	50	58	52.4	1.6	3.57771	Control	9
	senescence	5	50	54	51.6	0.979796	2.19089	Test	9
	senescence	5	50	61	53.8	2.00998	4.49444	Control	10
	senescence	5	50	50	50	0	0	Test	10
	senescence	5	50	50	50	0	0	Control	11
	senescence	4	50	50	50	0	0	Test	11
	senescence	5	50	50	50	0	0	Control	12
	senescence	5	50	50	50	0	0	Test	12
	senescence	3	50	54	51.3333	1.33333	2.3094	Control	13
	senescence	3	58	61	59	1	1.73205	Test	13
	senescence	5	50	54	50.8	0.8	1.78885	Control	14
	senescence	5	50	58	51.6	1.6	3.57771	Test	14
	senescence	5	50	61	56.8	2.13073	4.76445	Control	15
	senescence	5	50	65	55.4	2.82135	6.30872	Test	15
	senescence	5	50	58	54.8	1.49666	3.34664	Control	16
	senescence	5	54	54	54	0	0	Test	16
	senescence	4	50	61	53.75	2.59406	5.18813	Control	17
	senescence	5	50	50	50	0	0	Test	17
	senescence	4	50	58	55	1.91485	3.82971	Control	18
	senescence	4	50	58	52	2	4	Test	18
	senescence	5	50	58	51.6	1.6	3.57771	Control	19
	senescence	5	50	50	50	0	0	Test	19
	total.leaves	5	21	31	25.8	1.62481	3.63318	Control	1
	total.leaves	5	20	37	26	3.08221	6.89202	Test	1
	total.leaves	5	15	19	15.8	0.8	1.78885	Control	3
	total.leaves	5	11	16	13.8	0.860233	1.92354	Test	3
	total.leaves	5	12	19	14.6	1.32665	2.96648	Control	4
	total.leaves	5	11	16	13.8	1.15758	2.58844	Test	4
	total.leaves	5	10	14	12.4	0.678233	1.51658	Control	6
	total.leaves	5	11	15	13.2	0.734847	1.64317	Test	6
	total.leaves	5	14	20	17.4	1.16619	2.60768	Control	8
	total.leaves	5	13	19	15.4	1.1225	2.50998	Test	8
	total.leaves	5	9	12	10.4	0.678233	1.51658	Control	9
	total.leaves	5	10	12	10.8	0.374166	0.83666	Test	9
	total.leaves	5	17	26	19.4	1.74929	3.91152	Control	10
	total.leaves	5	15	21	17.4	1.02956	2.30217	Test	10
	total.leaves	5	13	14	13.2	0.2	0.447214	Control	11
	total.leaves	4	9	13	11	0.816497	1.63299	Test	11
	total.leaves	5	15	17	15.8	0.374166	0.83666	Control	12
	total.leaves	5	15	17	16	0.447214	1	Test	12
	total.leaves	5	15	18	16.2	0.489898	1.09545	Control	13
	total.leaves	5	13	19	16	1	2.23607	Test	13
	total.leaves	5	16	21	18.2	0.860233	1.92354	Control	14
	total.leaves	5	11	20	16.2	1.46287	3.27109	Test	14
	total.leaves	5	20	52	35.8	5.30471	11.8617	Control	15
	total.leaves	5	19	54	28.2	6.59848	14.7547	Test	15
	total.leaves	5	21	29	25.2	1.49666	3.34664	Control	16
	total.leaves	5	23	30	27.2	1.35647	3.03315	Test	16
	total.leaves	5	12	15	13.4	0.509902	1.14018	Control	17
	total.leaves	5	13	14	13.6	0.244949	0.547723	Test	17
	total.leaves	5	19	23	21	0.707107	1.58114	Control	18
	total.leaves	5	18	35	27	3.53553	7.90569	Test	18
	total.leaves	5	12	23	17	1.76068	3.937	Control	19
	total.leaves	5	16	18	16.8	0.489898	1.09545	Test	19
	Total_seed	4	0	10574.7	4461	2662.47	5324.94	Control	13
	Total_seed	5	957	6833.3	4753.6	1047.7	2342.73	Control	4
	Total_seed	5	1000	7737.7	5018.22	1150.67	2572.97	Control	15
	Total_seed	5	3280.7	6519	5530.88	593.164	1326.35	Control	16
	Total_seed	5	3178.7	11827.3	5802.68	1545.59	3456.05	Control	6
	Total_seed	5	2294	10545	5857.72	1383.04	3092.56	Control	1
	Total_seed	5	6150	9138.7	7860.8	481.097	1075.77	Control	12
	Total_seed	4	4836	11509.3	8187.87	1369.87	2739.74	Control	14
	Total_seed	5	5937.3	12012	8672.74	1234.95	2761.44	Control	19
	Total_seed	5	7828	9568	8724.48	326.435	729.93	Control	11
	Total_seed	5	6951	12852	8905.66	1107.57	2476.61	Control	17
	Total_seed	5	9593	13847	10906.3	803.225	1796.07	Control	9
	Total_seed	5	8370	13062.3	10970.5	929.701	2078.87	Control	18
	Total_seed	5	9089	15900	11386.3	1296.27	2898.56	Control	8
	Total_seed	5	9803.3	15635	12370.5	954.28	2133.84	Control	10
	Total_seed	5	9577	17280	12871.4	1374.17	3072.74	Control	3
	Total_seed	5	440	2800	2222.68	450.383	1007.09	Test	15
	Total_seed	5	885	4279.3	2805.66	667.51	1492.6	Test	14
	Total_seed	5	0	8631	2993	1625.03	3633.67	Test	13
	Total_seed	5	2040	4758.7	3030.2	487.296	1089.63	Test	16
	Total_seed	5	2375	5203	3668.92	516.748	1155.48	Test	1
	Total_seed	5	2065	5724	3930.86	583.849	1305.53	Test	18
	Total_seed	4	3048.3	6688	4695.75	858.948	1717.9	Test	11
	Total_seed	5	2224.8	6465.7	4714.24	890.157	1990.45	Test	9
	Total_seed	5	2145.7	6732	5044.48	791.505	1769.86	Test	17
	Total_seed	5	2878.3	8691.7	5260.66	949.959	2124.17	Test	4
	Total_seed	5	3200	9499	5574.06	1069.94	2392.45	Test	6
	Total_seed	5	2478	8730	5740.8	1087.91	2432.63	Test	3
	Total_seed	5	5221.3	7991	6101.02	497.253	1111.89	Test	12
	Total_seed	5	3074	11830	6307.4	1620.95	3624.56	Test	8
	Total_seed	5	4681	8514	6860.34	764.6	1709.7	Test	19
	Total_seed	5	6516	10440	8011.6	655.871	1466.57	Test	10
	Valid N (listwise)	0						Control	1
	Valid N (listwise)	5						Test	1
	Valid N (listwise)	0						Control	3
	Valid N (listwise)	5						Test	3
	Valid N (listwise)	0						Control	4
	Valid N (listwise)	4						Test	4
	Valid N (listwise)	0						Control	6
	Valid N (listwise)	4						Test	6
	Valid N (listwise)	0						Control	8
	Valid N (listwise)	5						Test	8
	Valid N (listwise)	0						Control	9
	Valid N (listwise)	4						Test	9
	Valid N (listwise)	0						Control	10
	Valid N (listwise)	4						Test	10
	Valid N (listwise)	0						Control	11
	Valid N (listwise)	3						Test	11
	Valid N (listwise)	0						Control	12
	Valid N (listwise)	4						Test	12
	Valid N (listwise)	0						Control	13
	Valid N (listwise)	3						Test	13
	Valid N (listwise)	0						Control	14
	Valid N (listwise)	5						Test	14
	Valid N (listwise)	0						Control	15
	Valid N (listwise)	2						Test	15
	Valid N (listwise)	0						Control	16
	Valid N (listwise)	5						Test	16
	Valid N (listwise)	0						Control	17
	Valid N (listwise)	4						Test	17
	Valid N (listwise)	0						Control	18
	Valid N (listwise)	4						Test	18
	Valid N (listwise)	0						Control	19
	Valid N (listwise)	5						Test	19

## Sheet: Sheet2
Accession	Avg_temp	Flowering time	Leaf_area	C_Branches	R_branches	Branch_ratio	C-Height	R_height	Height_ratio	C-fitness	T_fitness	Fitness_maint
Bur-0	4.5	35.6	68.74	5.4	5.8	1.07407	41.4	38.6	0.932367	5857.72	3668.92	0.63
Col-0	15.5	32.8	31.46	5.2	3.8	0.730769	44	37.2	0.845455	12871.4	5740.8	0.45
Ct-1	13.5	32.6	25.82	2.8	4.8	1.71429	41	41.4	1.00976	4753.6	5260.66	1.11
Hi-0	5.5	28.6	9.51	3.6	4.8	1.33333	34.2	33.6	0.982456	5802.68	5574.06	0.96
Kn-0	3.5	32.5	37.09	6.2	5	0.806452	46.2	43	0.930736	11386.3	6307.4	0.55
Ler-0	3.5	28	6.83	4.8	3.2	0.666667	28.4	24	0.84507	10906.3	4714.24	0.43
Mt-0	15.5	32.8	39.32	5.2	5.6	1.07692	45.8	41.4	0.90393	12370.5	8011.6	0.65
No-0	5.5	30.85	15.19	5.6	3.5	0.625	44	36.5	0.829545	8724.48	4695.75	0.54
Oy-0	3.5	32.5	45.86	6	6.8	1.13333	45.2	38.8	0.858407	7860.8	6101.02	0.78
Rsch-0	1	33.1	27.28	5.75	4.6	0.8	38.5	30.4	0.78961	8187.88	2805.66	0.34
Sf-2	11.5	37.75	54.16	5	3.8	0.76	42.8	31.4	0.733645	5018.22	2222.68	0.44
Tsu-0	9.5	35.8	63.6	5	5.6	1.12	48.2	38.8	0.804979	5530.88	3030.2	0.55
Wil-2	1	30	15.29	5.2	4	0.769231	42.4	34	0.801887	8905.66	5044.48	0.57
Ws-0	3.5	34.3	47.3	5.2	4	0.769231	57.8	44	0.761246	10970.5	3930.86	0.36
Wu-0	5.5	33.2	29.1	6.4	6.4	1	36.6	36.4	0.994536	8672.74	6860.34	0.79
Ket to variables:
													#DIV/0!
Avg_temp: average spring temperature for the place of origin of each accession
Flowering time: Avergae flowering time for each acession. Because flowering time occurred before treatment, the average include all plant of each accession
Leaf_area: Average of total leaf area per rosette per accession. Calculated based on leaves removed for the leaf removal treatment,
C-branches: Average number of branches (from rosette or infloresecence) per plant in each accession assigned to control treatment
R-branches: Average number of branches (from rosette or infloresecence) per plant in each accession assigned to Removal treatment
C-height: Average infloresecence height per plant in each accession assigned to control treatment
R-height: Average infloresecence height per plant in each accession assigned toRemoval treatment
C-fitness: Average number of seeds produced per plant in each accession assigned to Control treatment
R-fitness: Average number of seeds produced per plant in each accession assigned to Removal treatment
Fitness_maint: Fitness maintained in removal treatment in comparison to control. Equal to: R_fitness/C_fitness
Fitness_diff: Fitness difference between cxontrol and removal treatment. Equal to: C_fitness - R_fitness
